# Supplementary material for: Exploring the effect of molecular size and framework functionalisation on transport in metal–organic frameworks using pulsed-field gradient nuclear magnetic resonance
Source: Royal Society of Chemistry journal article supplement (doi:10.1039/d4cp00447g), 2024-01-01
Supplement: d4cp00447g1.pdf [file d4cp00447g1.pdf]

## Exploring the effect of molecular size and framework functionalisation on transport in metal-organic frameworks using pulsed-field gradient nuclear magnetic resonance

Shima Zainal<sup>a</sup>, Ahmed Alsudani<sup>b</sup>, Ralph W. Adams<sup>b</sup>, Mathias Nilsson<sup>b</sup>, Xiaolei Fan<sup>a,c,\*</sup>, Carmine D'Agostino<sup>a,d\*</sup>

<sup>a</sup> Department of Chemical Engineering, The University of Manchester, Oxford Road, Manchester, M13 9PL, United Kingdom

<sup>b</sup> Department of Chemistry, The University of Manchester, Oxford Road, Manchester, M13 9PL, United Kingdom

<sup>c</sup> Ningbo China Beacons of Excellence Research and Innovation Institute, University of Nottingham Ningbo China, 211 Xingguang Road, Ningbo 315048, China

<sup>d</sup> Dipartimento di Ingegneria Civile, Chimica, Ambientale e dei Materiali (DICAM), Alma Mater Studiorum – Università di Bologna, Via Terracini, 28, 40131 Bologna, Italy

\* Corresponding authors:

Email address:

[carmine.dagostino@manchester.ac.uk](mailto:carmine.dagostino@manchester.ac.uk) (C.D.)

[xiaolei.fan@manchester.ac.uk](mailto:xiaolei.fan@manchester.ac.uk) (X.F.)

## Electronic Supplementary Information (ESI)

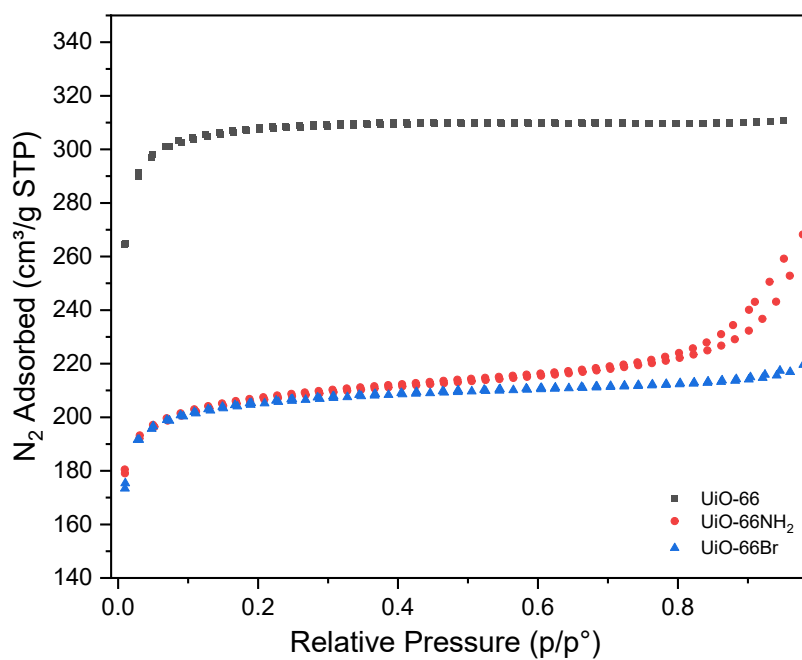

**Figure S1.** N<sub>2</sub> adsorption-desorption isotherms for UiO66 and its derivatives at 77 K.

**Table S1.** Textural properties and calculated pore sizes of the MOFs under investigation.

| MOF                   | Surface area (SA)                              | Pore diameter ( $d_{\text{XRD}}$ ) | Pore volume (V)                                 |
|-----------------------|------------------------------------------------|------------------------------------|-------------------------------------------------|
|                       | (m <sup>2</sup> g <sup>-1</sup> ) <sup>a</sup> | (nm) <sup>b</sup>                  | (cm <sup>3</sup> g <sup>-1</sup> ) <sup>c</sup> |
| UiO-66                | 953                                            | 0.8, 1.4                           | 0.45                                            |
| UiO-66NH <sub>2</sub> | 892                                            | 0.8, 1.4                           | 0.27                                            |
| UiO-66Br              | 691                                            | 0.8, 1.4                           | 0.28                                            |

<sup>a</sup> By the BET method using the N<sub>2</sub> physisorption isotherms; <sup>b</sup> Estimated pore sizes based on CIF file; <sup>c</sup> t-plot

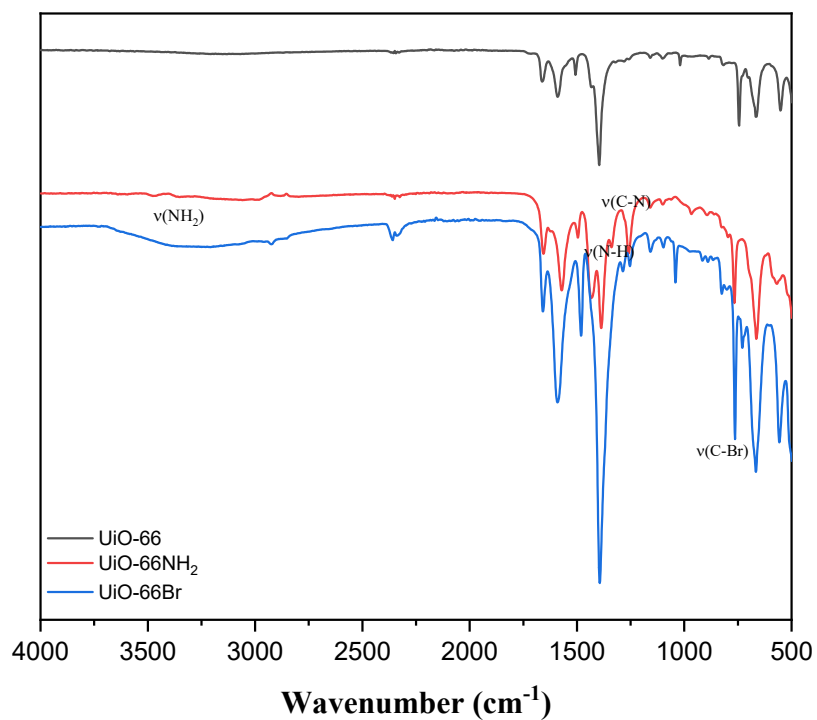

**Figure S2.** FT-IR spectra of the pristine UiO-66 MOF and its derivatives.

**Table S2.** Characteristic IR bands of the linkers and MOFs under investigation.

| Compound              | Colour | $\nu$ (C-NH <sub>2</sub> )<br>(cm <sup>-1</sup> ) | $\nu$ (C-N)<br>(cm <sup>-1</sup> ) | $\nu$ (C-Br)<br>(cm <sup>-1</sup> ) | $\nu$ (C=O)<br>(cm <sup>-1</sup> ) | $\nu$ (OH)<br>(cm <sup>-1</sup> ) |
|-----------------------|--------|---------------------------------------------------|------------------------------------|-------------------------------------|------------------------------------|-----------------------------------|
| BDC                   | White  | -                                                 | -                                  | -                                   | 1700 (s)                           | 2900 (m)                          |
| NH <sub>2</sub> -BDC  | Yellow | 3507 (m)<br>3384 (m)                              | 1210 (m)                           | -                                   | 1705 (s)                           | 2901(m)                           |
| Br-BDC                | White  | -                                                 | -                                  | 680 (m)                             | 1710 (s)                           | 2914 (m)                          |
| UiO-66                | White  |                                                   |                                    |                                     |                                    |                                   |
| UiO-66NH <sub>2</sub> | Yellow | 3501 (br)<br>3390 (br)                            | 1250 (m)                           |                                     |                                    |                                   |
| UiO-66Br              | White  |                                                   |                                    | 690 (m)                             |                                    |                                   |

br = broad; s = strong; m = medium.

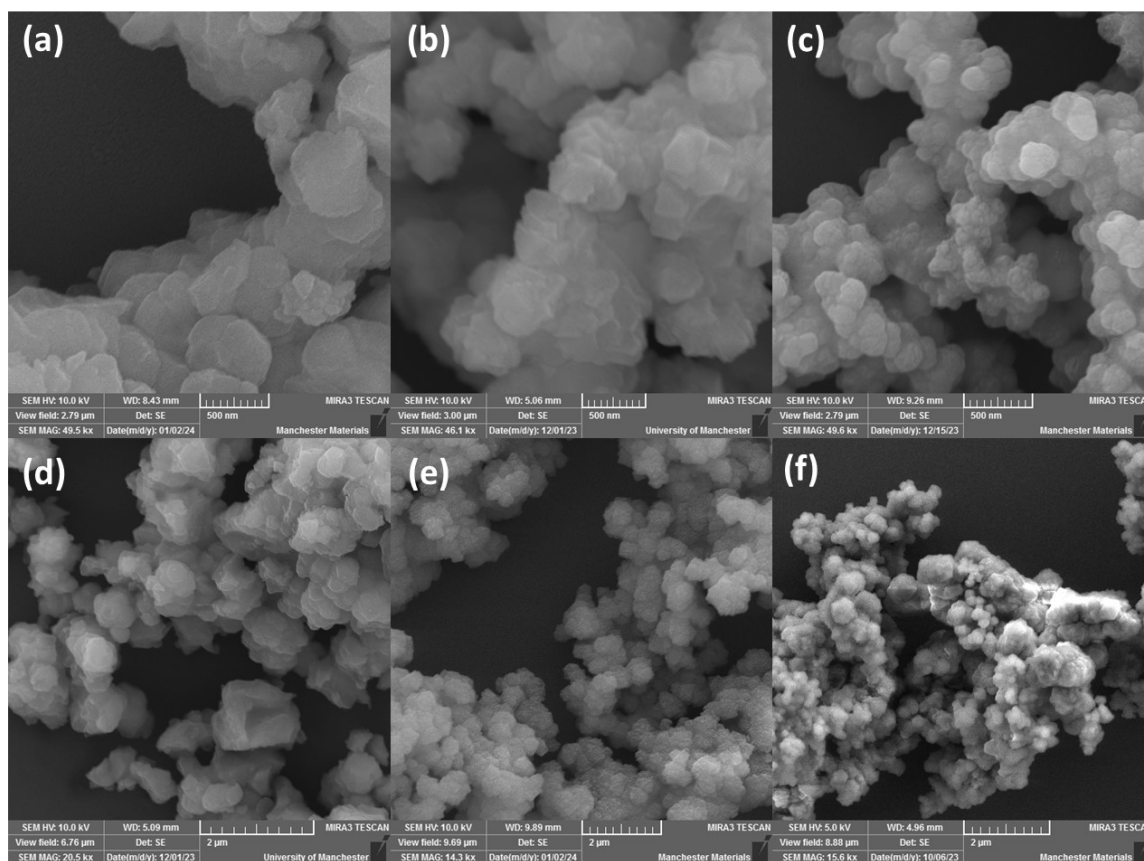

**Figure S3.** SEM images for (a)(d) UiO-66, (b)(e) UiO-66NH<sub>2</sub> and (c)(f) UiO-66Br at 500 nm and 2 μm, respectively.

**Table S3.** Summary of the diffusion results for water, *p*-xylene, *m*-xylene, *o*-xylene, *n*-octane and TIPB in UiO-66 at an observation time  $\Delta = 100$  ms.  $D_{1,self}$  represents the fast diffusion coefficient, while  $D_{2,self}$  represents the slow diffusion coefficient.

| Probe molecule   | $D_{bulk}$<br>( $10^{-10} \text{ m}^2 \text{ s}^{-1}$ ) | $D_{1,self}$<br>( $10^{-10} \text{ m}^2 \text{ s}^{-1}$ ) | $D_{2,self}$<br>( $10^{-10} \text{ m}^2 \text{ s}^{-1}$ ) | $\xi_1 = \frac{D_{bulk}}{D_{1,self}}$ | $\xi_2 = \frac{D_{bulk}}{D_{2,self}}$ | $RMSD_1$<br>( $\mu\text{m}$ ) | $RMSD_2$ ( $\mu\text{m}$ ) |
|------------------|---------------------------------------------------------|-----------------------------------------------------------|-----------------------------------------------------------|---------------------------------------|---------------------------------------|-------------------------------|----------------------------|
| Water            | $23.3 \pm 0.03$                                         | $10.9 \pm 0.10$                                           | $1.13 \pm 0.31$                                           | $2.13 \pm 0.15$                       | $20.6 \pm 1.44$                       | 14.7                          | 4.75                       |
| <i>p</i> -Xylene | $21.2 \pm 0.02$                                         | $12.6 \pm 0.22$                                           | $2.30 \pm 0.08$                                           | $1.68 \pm 0.12$                       | $9.22 \pm 0.65$                       | 15.9                          | 6.78                       |
| <i>m</i> -Xylene | $20.2 \pm 0.02$                                         | $12.5 \pm 0.23$                                           | $1.91 \pm 0.12$                                           | $1.62 \pm 0.11$                       | $10.6 \pm 0.74$                       | 15.8                          | 6.18                       |
| <i>o</i> -Xylene | $16.0 \pm 0.02$                                         | $9.93 \pm 0.21$                                           | $1.41 \pm 0.07$                                           | $1.61 \pm 0.11$                       | $11.3 \pm 0.79$                       | 14.1                          | 5.31                       |
| <i>n</i> -Octane | $23.6 \pm 0.03$                                         | $10.5 \pm 0.33$                                           | $1.47 \pm 0.07$                                           | $2.25 \pm 0.15$                       | $16.1 \pm 1.13$                       | 14.5                          | 5.42                       |
| TIPB             | $2.45 \pm 0.01$                                         | $1.78 \pm 0.01$                                           | -                                                         | $1.38 \pm 0.09$                       | -                                     | 5.97                          | -                          |

**Table S4.** Summary of the diffusion results of water, *p*-xylene, *m*-xylene, *o*-xylene, *n*-octane and TIPB in UiO-66NH<sub>2</sub> at an observation time  $\Delta = 100$  ms.  $D_{1,self}$  represents the fast diffusion coefficient, while  $D_{2,self}$  represents the slow diffusion coefficient.

| Probe molecule   | $D_{bulk}$<br>( $10^{-10} \text{ m}^2 \text{ s}^{-1}$ ) | $D_{1,self}$<br>( $10^{-10} \text{ m}^2 \text{ s}^{-1}$ ) | $D_{2,self}$<br>( $10^{-10} \text{ m}^2 \text{ s}^{-1}$ ) | $\xi_1 = \frac{D_{bulk}}{D_{1,self}}$ | $\xi_2 = \frac{D_{bulk}}{D_{2,self}}$ | $RMSD_1$ ( $\mu\text{m}$ ) | $RMSD_2$ ( $\mu\text{m}$ ) |
|------------------|---------------------------------------------------------|-----------------------------------------------------------|-----------------------------------------------------------|---------------------------------------|---------------------------------------|----------------------------|----------------------------|
| Water            | $23.3 \pm 0.03$                                         | $9.72 \pm 0.31$                                           | $0.26 \pm 0.31$                                           | $2.40 \pm 0.17$                       | $89.6 \pm 6.27$                       | 13.9                       | 2.28                       |
| <i>p</i> -Xylene | $21.2 \pm 0.02$                                         | $12.4 \pm 0.11$                                           | $1.83 \pm 0.17$                                           | $1.71 \pm 0.12$                       | $11.6 \pm 0.81$                       | 15.7                       | 6.05                       |
| <i>m</i> -Xylene | $20.2 \pm 0.02$                                         | $12.5 \pm 0.11$                                           | $1.72 \pm 0.19$                                           | $1.62 \pm 0.11$                       | $11.7 \pm 0.82$                       | 15.8                       | 5.87                       |
| <i>o</i> -Xylene | $16.0 \pm 0.02$                                         | $9.73 \pm 0.06$                                           | $1.66 \pm 0.10$                                           | $1.64 \pm 0.12$                       | $9.64 \pm 0.67$                       | 13.9                       | 5.76                       |
| <i>n</i> -Octane | $23.6 \pm 0.03$                                         | $12.4 \pm 0.13$                                           | $0.45 \pm 0.03$                                           | $1.90 \pm 0.13$                       | $52.4 \pm 3.67$                       | 15.7                       | 3.00                       |
| TIPB             | $2.45 \pm 0.01$                                         | $1.84 \pm 0.01$                                           | -                                                         | $1.33 \pm 0.09$                       | -                                     | 6.06                       | -                          |

**Table S5.** Summary of the diffusion results of water, *p*-xylene, *m*-xylene, *o*-xylene, *n*-octane and TIPB in UiO-66Br at an observation time  $\Delta = 100$  ms.  $D_{1,self}$  represents the fast diffusion coefficient, while  $D_{2,self}$  represents the slow diffusion coefficient.

| Probe molecule   | $D_{bulk}$<br>( $10^{-10} \text{ m}^2 \text{ s}^{-1}$ ) | $D_{1,self}$<br>( $10^{-10} \text{ m}^2 \text{ s}^{-1}$ ) | $D_{2,self}$<br>( $10^{-10} \text{ m}^2 \text{ s}^{-1}$ ) | $\xi_1 = \frac{D_{bulk}}{D_{1,self}}$ | $\xi_2 = \frac{D_{bulk}}{D_{2,self}}$ | $RMSD_1$ ( $\mu\text{m}$ ) | $RMSD_2$ ( $\mu\text{m}$ ) |
|------------------|---------------------------------------------------------|-----------------------------------------------------------|-----------------------------------------------------------|---------------------------------------|---------------------------------------|----------------------------|----------------------------|
| Water            | $23.3 \pm 0.03$                                         | $12.5 \pm 0.07$                                           | $1.79 \pm 0.30$                                           | $1.86 \pm 0.13$                       | $13.2 \pm 0.92$                       | 15.8                       | 5.98                       |
| <i>p</i> -Xylene | $21.2 \pm 0.02$                                         | $14.9 \pm 0.07$                                           | $2.42 \pm 0.19$                                           | $1.42 \pm 0.10$                       | $8.76 \pm 0.61$                       | 17.3                       | 6.96                       |
| <i>m</i> -Xylene | $20.2 \pm 0.02$                                         | $12.6 \pm 0.12$                                           | $1.35 \pm 0.14$                                           | $1.60 \pm 0.11$                       | $14.9 \pm 1.04$                       | 15.8                       | 5.20                       |
| <i>o</i> -Xylene | $16.0 \pm 0.02$                                         | $11.4 \pm 0.03$                                           | $1.28 \pm 0.16$                                           | $1.40 \pm 0.10$                       | $12.5 \pm 0.88$                       | 15.1                       | 4.75                       |
| <i>n</i> -Octane | $23.6 \pm 0.03$                                         | $16.1 \pm 0.10$                                           | $1.13 \pm 0.21$                                           | $1.47 \pm 0.10$                       | $20.6 \pm 1.44$                       | 17.9                       | 4.52                       |
| TIPB             | $2.45 \pm 0.01$                                         | $1.75 \pm 0.01$                                           | -                                                         | $1.40 \pm 0.10$                       | -                                     | 5.92                       | -                          |

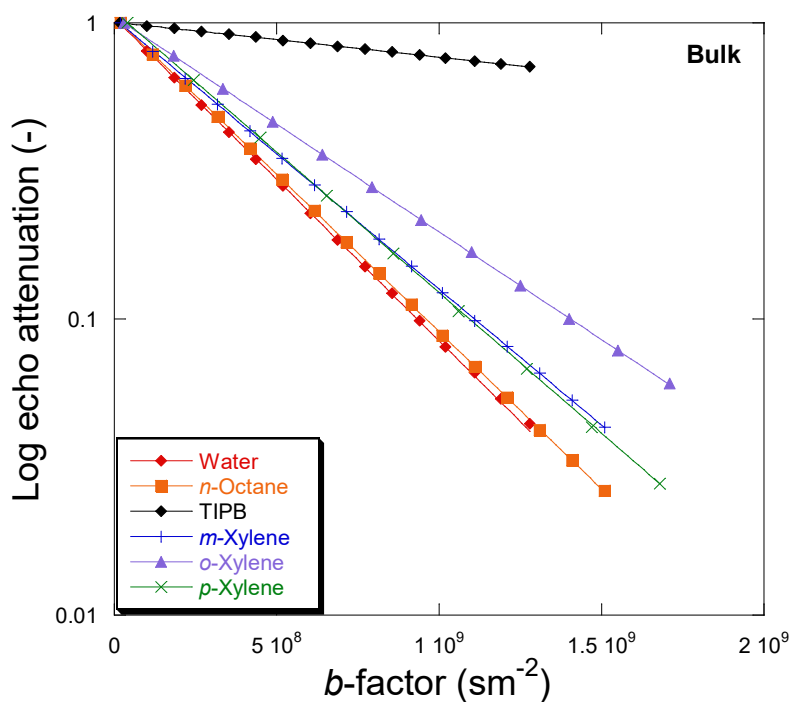

**Figure S4.** Diffusion attenuation plots for all bulk probe molecules.

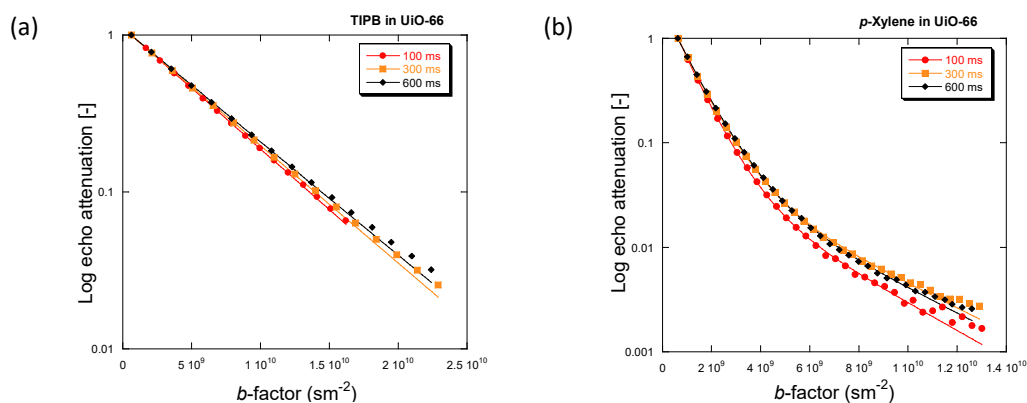

**Figure S5.** Diffusion attenuation plots for (a) TIPB and (b) *p*-xylene within the porous network of UiO-66 at different diffusion observation times.

**Table S6.** Summary of the diffusion results of all probe molecules in UiO-66 at different observation time  $\Delta$ .  $D_{1,\text{self}}$  represents the first diffusion coefficient, while  $D_{2,\text{self}}$  represents the second self-diffusion coefficient.

| Probe molecule   | Observation time $\Delta$ [ms]                                   |                                                                  |                                                                  |                                                                  |                                                                  |                                                                  |
|------------------|------------------------------------------------------------------|------------------------------------------------------------------|------------------------------------------------------------------|------------------------------------------------------------------|------------------------------------------------------------------|------------------------------------------------------------------|
|                  | 100                                                              |                                                                  | 300                                                              |                                                                  | 600                                                              |                                                                  |
|                  | $D_{1,\text{self}}$<br>( $10^{-10} \text{ m}^2 \text{ s}^{-1}$ ) | $D_{2,\text{self}}$<br>( $10^{-10} \text{ m}^2 \text{ s}^{-1}$ ) | $D_{1,\text{self}}$<br>( $10^{-10} \text{ m}^2 \text{ s}^{-1}$ ) | $D_{2,\text{self}}$<br>( $10^{-10} \text{ m}^2 \text{ s}^{-1}$ ) | $D_{1,\text{self}}$<br>( $10^{-10} \text{ m}^2 \text{ s}^{-1}$ ) | $D_{2,\text{self}}$<br>( $10^{-10} \text{ m}^2 \text{ s}^{-1}$ ) |
| TIPB             | $1.8 \pm 0.02$                                                   | -                                                                | $1.8 \pm 0.02$                                                   | -                                                                | $1.7 \pm 0.01$                                                   | -                                                                |
| <i>p</i> -Xylene | $12.6 \pm 0.22$                                                  | $2.3 \pm 0.08$                                                   | $10.8 \pm 0.02$                                                  | $2.1 \pm 0.02$                                                   | $10.5 \pm 0.01$                                                  | $2.2 \pm 0.04$                                                   |
